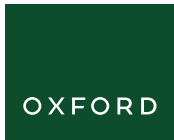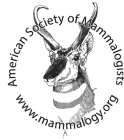

## Society Content

# ASM Comments and News

### SAVE THE DATE!!! 103<sup>RD</sup> ANNUAL MEETING OF THE AMERICAN SOCIETY OF MAMMALOGISTS

Please join us 7 to 11 June 2024 for the 103<sup>rd</sup> Annual Meeting of the American Society of Mammalogists, to be held at the campus of CU Boulder in Boulder, Colorado. Learn about the latest advances in the study of mammals and interact with researchers and educators specializing in these fascinating animals.

The scientific program will include contributed oral and poster presentations as well as plenary speakers, symposia, and workshops. A full social agenda also is planned, including fieldtrips, opening social, the annual Run-for-Research, student social, and closing social and awards ceremony. Detailed conference and registration information will be made available on the conference website ([www.mammalmeetings.org](http://www.mammalmeetings.org)).

For more information about the 2024 meeting, contact the ASM Program Director, John Hanson ([mammal.meetings@gmail.com](mailto:mammal.meetings@gmail.com)) or meeting planner, Kerrell Dunsmore ([kerrell@thenextgreatevent.com](mailto:kerrell@thenextgreatevent.com)).

### STUDENT PROGRAMS

ASM is deeply committed to fostering future generations of mammalogists. We support our student and early-career members financially in a variety of ways, including grants to support new and ongoing research projects, awards, fellowships, and honoraria to recognize accomplishments of students and early-career mammalogists, and travel awards to offset the costs of attending the annual meeting (Table 1). Students and early-career scientists are also eligible for some other Society awards and recognitions, but those require nominations rather than a submitted application. Visit the ASM website for links to each grant or award, with details on eligibility, how to apply, and any changes to deadlines, at [www.mammalogy.org/grants](http://www.mammalogy.org/grants).

**Grants-in-Aid of Research** (up to \$1,500) support field or laboratory research in any area of mammalogy. Applications due 1 March.

**African Research Fellowships** (up to \$1,500) support research by African nationals in any area of mammalogy. Applications due 15 April.

**Latin American Field Research Awards** (up to \$1,500) support field projects in mammalogy by Latin American students. Applications due 1 March.

The **James L. Patton Award** (\$5,000) supports museum-based research in mammalogy, including travel costs to visit collections. Applications due 1 March.

The **Donald W. and Glennis A. Kaufman Research Award** (\$2,500) supports field-based ecological research on native mammals in the North American Great Plains, with an emphasis on rodents and shrews. Applications due 1 March.

The **Guy N. Cameron Rodent Research Award** (one graduate student, one postdoctoral researcher, at \$5,000 each) supports field research on rodents in the Western Hemisphere. Applications due 1 March.

**Student Science Policy Awards** provide an expense-paid trip to Washington, D.C., for a two-day event in the spring in which students interested in the science-policy interface receive public policy training and participate in Congressional Visits Day. Applications due 21 January.

The **Black and Indigenous Scholars in Mammalogy Award** (one or two awards, up to \$1,500 each) provides funds to support research or other activities in mammalogy of a scholar (high school age or older) from, or residing in, the Western Hemisphere who is of Black/African American origin and/or a representative of any of the Indigenous Peoples of the Americas. Applications due 1 March.

**Honoraria** are awarded to four graduate students (\$2,000) and two undergraduate students (\$1,200) to present the results of their research at ASM meetings. Applications due 15 February.

The **ASM Fellowship** (\$20,000 for 2021) recognizes accomplishments in mammalogy by a graduate student and is our highest student award. Funds are not dedicated to a specific research proposal, but intended to support the student in any capacity that promotes a professional career in mammalogy. Applications due 1 May.

The **Albert and Alma Shadle Fellowship in Mammalogy** (\$5,003 for 2021) also recognizes accomplishments in mammalogy by a graduate student. Like the ASM Fellowship, the Shadle Fellowship is not a grant in support of a specific project, but intended to allow the recipient greater freedom in pursuing their research and promoting a professional career in mammalogy. Students must be enrolled in a college or university in the United States to receive the Shadle Fellowship. Applications due 1 March.

The **Oliver P. Pearson Award** (\$5,000, plus \$2,000 for travel to an ASM meeting) supports a young professional (within 5 years of receipt of PhD) who holds an academic position in a Latin American institution. Applications due 1 March.

In addition to the above, the ASM offers **Travel Awards** to both students and early career professionals to aid in attending ASM meetings. Requests for support are submitted at the time of abstract submission for the annual meeting.

**Table 1.** —ASM Student and Early-career Awards and Grants

| Aim                                                                                                         | ASM Funding Program                                   | Award Type                            | Undergraduate | Graduate | Early-career |
|-------------------------------------------------------------------------------------------------------------|-------------------------------------------------------|---------------------------------------|---------------|----------|--------------|
| Provide funds for new and ongoing research projects and professional development                            | Grants-in-Aid of Research                             | Research funds                        | X             | X        |              |
|                                                                                                             | Latin American Graduate Student Field Research Awards | Research funds                        |               | X        |              |
|                                                                                                             | African Research Fellowships                          | Research funds                        |               | X        |              |
|                                                                                                             | James L. Patton Award                                 | Research funds                        |               | X        |              |
|                                                                                                             | Donald W. and Glennis A. Kaufman Research Award       | Research funds                        |               | X        |              |
|                                                                                                             | Guy N. Cameron Rodent Research Award                  | Research funds                        |               | X        | X            |
|                                                                                                             | Student Science Policy Awards                         | Conference travel and AIBS membership |               | X        |              |
| Recognize outstanding completed student research or other contributions to mammalogy                        | Black and Indigenous Scholars in Mammalogy Award      | Research funds                        | X             | X        | X            |
|                                                                                                             | Undergraduate Student Honoraria                       | Meeting travel funds                  | X             |          |              |
|                                                                                                             | Graduate Student Honoraria                            | Meeting travel funds                  |               | X        |              |
| Recognize excellence in student research and service and the potential for a productive career in mammalogy | Carol and Jim Patton Awards                           | ASM memberships                       |               | X        |              |
|                                                                                                             | American Society of Mammalogists Fellowship           | Research funds                        |               | X        |              |
|                                                                                                             | Albert R. and Alma Shadle Fellowship                  | Research funds                        |               | X        |              |
| Support participation in Annual Meeting and ASM                                                             | Oliver P. Pearson Award                               | Research and Meeting travel funds     |               |          | X            |
|                                                                                                             | Travel Awards                                         | Meeting travel funds                  | X             | X        | X            |

## ANNOUNCEMENTS

### SPONSOR FUND

The International Relations Committee has devised a method of providing membership in ASM to mammalogists from outside the United States and Canada who wish to become members, but simply cannot afford to. Some members already sponsor ASM membership for foreign mammalogists on a continual basis. However, others who are unable to provide a full membership on a continual basis, may wish to contribute a partial membership or a full membership during some years. Such is now possible through contributions to the Sponsor Fund. The fund will be handled as follows:

Members who want to help sponsor membership of a mammalogist can do so by going to the ASM business office website: <https://asm.wildapricot.org/Donate> and selecting the Sponsored Membership Fund.

When money in the Fund reaches any multiple of the current amount for annual dues, dues for a mammalogist in need of sponsorship will be paid. Contributions will be used directly to sponsor foreign members: the Fund will not be of the type from which only the interest is used to pay memberships.

Money in the Fund will be managed through the Secretary-Treasurer's office.

The Secretary-Treasurer shall be designated as the sponsor of record.

At the end of three years, members of the International Relations Committee will verify that sponsored individuals still need and want sponsorship. Sponsorship from the fund could extend to a maximum of five years.

Members should submit names and mailing and e-mail addresses of foreign mammalogists in need of sponsorship to the chair of the International Relations Committee, Andrea Previtali ([andrea.previtali@gmail.com](mailto:andrea.previtali@gmail.com)).

### MAMMAL IMAGES LIBRARY

The Mammal Images Library is a nonprofit educational service of the American Society of Mammalogists. The goal of the library is providing images of mammals for educational purposes worldwide. The present collection consists of 6,200+ images depicting 27 orders, 163 families, 890+ genera, and 2,000+ species. Images suitable for optical projection for nonprofit, educational purposes may be viewed and obtained on the Society's website at <http://www.mammalogy.org/image-library>. Please remember to credit

the photographer and the library if images are used for optical projection.

In addition to optical projection for nonprofit instruction, many of the images can be employed (with permission) for other purposes, including commercial uses. For permission to use images for purposes other than nonprofit optical projection, contact the committee chair: David Huckaby, California State University, Long Beach, Department of Biological Sciences, 1250 Bellflower Boulevard, Long Beach, CA 90840-9502; [david.huckaby@csulb.edu](mailto:david.huckaby@csulb.edu); 562-985-4869; Fax: 562-985-8878.

The Library continually seeks new images for the collection and urges anyone having images to contribute them. For information about contributing images, contact the committee chair. The committee thanks the hundreds of people who have contributed images thus far.

### MAMMALIAN SPECIES ACCOUNTS

*Mammalian Species* accounts are produced by assignment only. Upon written request to the Editor-in-Chief for *Mammalian Species*, exclusive privileges to produce an account will be granted for one year, with the possibility of a one-year extension if the Editor-in-Chief is convinced that sufficient progress is being made toward completion. At the Editor's discretion, assignments not submitted at the end of this period may be cancelled. A maximum of five species may be reserved at one time. Please see additional instructions on procedures for reserving an account on the

*Mammalian Species* website: [https://academic.oup.com/mspecies/pages/General\\_Instructions](https://academic.oup.com/mspecies/pages/General_Instructions).

*Mammalian Species* is available online-only to all ASM members; print copies are no longer published. Requests for assignment of species and other editorial queries should be addressed to Meredith Hamilton, Editor-in-Chief of *Mammalian Species*, Department of Zoology, Oklahoma State University, Stillwater, OK 74078; [meredith.hamilton@okstate.edu](mailto:meredith.hamilton@okstate.edu).

### BUDDY SYSTEM FOR AUTHORS

ASM has a "buddy system" to assist authors who are not native English speakers with the preparation of their manuscripts for submission to the *Journal of Mammalogy*. "Buddies" are mammalogists who have offered to preview manuscripts that need editorial revision for writing in English. Manuscripts are assigned to "buddies" after they have been submitted to the Journal and the editorial staff has determined that the manuscript would benefit from the assistance of a "buddy" before the manuscript is formally peer-reviewed. Individuals interested in having their names added to the list of "buddies" should contact Virginia Hayssen ([vhayssen@smith.edu](mailto:vhayssen@smith.edu)).

### DEATHS REPORTED

Kunwar Bhatnagar, Life Member (deceased in 2021 but previously unreported in the Journal)  
 Chester Martin, Regular Member  
 Roy Horst, Life Member

## ACKNOWLEDGING THE GENEROSITY OF OUR DONORS

The long-term vitality of the American Society of Mammalogists depends upon the philanthropy of our members and others that support our programs in research and education. We gratefully acknowledge the generosity of those who have made monetary contributions to the Society during the past year. Such contributions have been particularly critical in supporting the next generation of mammalogists — our students. Funds to which donations can be directed include: a) African Research Fellowship Fund; b) Annual Meeting Contribution; c) ASM Contribution Fund (General Reserve Fund); d) Black and Indigenous Scholars in Mammalogy Award; e) Future Mammalogists Fund (donations to the annual auction are deposited in this fund); f) James L. Patton Award; g) Latin American Student Research Fund; h) Sponsored Membership Program; i) J. Mary Taylor Award for Diversity and Inclusive Excellence in Mammalogy. Details about these and other funds can be found on the ASM website, as well as a link where donations can be made (<https://asm.wildapricot.org/Donate>).

### \$30,000-\$39,999

Beth Winkler<sup>d</sup>

### \$20,000-\$29,999

James Patton<sup>c</sup>

### \$10,000-\$19,999

Dirk Van Vuren<sup>a,d</sup>

### \$5,000-\$9,999

Anonymous<sup>a,d,g</sup>

Diane and Doug Goheen<sup>a</sup>

### \$2,500-\$4,999

Alicia Linzey<sup>a</sup>

John D. Haweeli<sup>a</sup>

Edward J. Heske<sup>a,d,g</sup>

Mary Price<sup>a,g</sup>

Caroline Thorington<sup>e</sup>

### \$1,000-\$2,499

Bryan McLean<sup>a</sup>

J. Mary Taylor<sup>i</sup>

Joseph Cook<sup>a,d,g</sup>

### \$400-\$999

Donald E. Moore<sup>g</sup>

Guy Cameron<sup>a</sup>

WEST, Inc<sup>a</sup>

Timothy Smyser<sup>d</sup>

Loren Cassin Sackett<sup>g</sup>

Stephen Jenkins<sup>e</sup>

### \$250-\$399

Kayce Bell<sup>d</sup>

Paul Stapp<sup>a,g</sup>

Samara Trusso<sup>d</sup>

### \$150-\$249

Catherine Badgley<sup>a</sup>

Erika Barthelmess<sup>c</sup>

Jory Brinkerhoff<sup>a</sup>

Robert Pringle<sup>a</sup>

Karen Zich Reiss<sup>f</sup>

Corey Welsh<sup>d</sup>

Brad Blood<sup>b</sup>

Zuleyma Tang-Martinez<sup>h</sup>

### \$100-\$149

John Bassett<sup>e</sup>

Nikki Castleberry<sup>g</sup>

Blair Costelloe<sup>a,d</sup>

Holly Edwards<sup>d</sup>

Kristina Ernest<sup>d</sup>

George Feldhamer<sup>d</sup>

Louise Formann<sup>d</sup>

Lawrence Heaney<sup>h</sup>

Alex Jensen<sup>d</sup>

Gladys Kalema-Zikusoka<sup>a,d</sup>

Patrick Kelly<sup>d</sup>

Brooks Kohli<sup>a,d,g</sup>

Peter Law<sup>a</sup>

Suzanne McLaren<sup>a</sup>

Ryan W. Norris<sup>a</sup>

Eric Rickart<sup>h</sup>

Patrice Showers Corneli<sup>a,g,i</sup>

### \$50-\$99

Krzysztof Kozak<sup>a,d,g,i</sup>

Emma Gómez-Ruiz<sup>g</sup>

Thomas Giarla<sup>d</sup>

C. William Kilpatrick<sup>d</sup>

Rebekah Kim<sup>d</sup>

Patrick Moehlman<sup>a</sup>

Roberto Vilela<sup>d</sup>

John Yunger<sup>c</sup>

### \$40-\$49

Annaliese Beery<sup>a,d,g,i</sup>

Christopher Conroy<sup>a,d,g,i</sup>

Kelly Crandall<sup>a,d,g,i</sup>

Burton Lim<sup>a,d,g,i</sup>

Robert Martin<sup>g,i</sup>

Naoki Ohnishi<sup>a</sup>

Janet Rachlow<sup>a,d,g,i</sup>

Sergio A. Solari<sup>g</sup>

Caitlin Wells<sup>a,d,g,i</sup>

### Up to \$39

Merav Ben-David<sup>a,d,g</sup>

Stephen Mech<sup>d,g,i</sup>

Douglas Kibbe<sup>g</sup>

Ana-Maria Benedek-Sîrbu<sup>a,g</sup>

George Boettner<sup>g</sup>

Marcos da Cruz<sup>a,d</sup>

Lily Harrison<sup>a</sup>

Dorcas MacClintock<sup>i</sup>

Marta Manser<sup>a,g</sup>

Julia Owen-Ramos<sup>d,i</sup>

Andrea Previtali<sup>g</sup>

Eleonore Z. F. Setz<sup>g</sup>

Sandra Talbot<sup>d</sup>

William Vickery<sup>a,d</sup>

Siobhan Cooke<sup>g</sup>

Louise Emmons<sup>a</sup>

James Friend<sup>a</sup>

Andre Ganswindt<sup>a</sup>

Stephanye Mata Gonzalez<sup>g</sup>

Brett Jesmer<sup>g</sup>

Yayoi Kaneko<sup>a</sup>

Thomas Serfass<sup>d</sup>

Kelly Speer<sup>d</sup>

Markus Zöttl<sup>a</sup>

**REVIEWERS FOR THE JOURNAL OF MAMMALOGY IN 2023**

Peter Adamik  
 Amanda Adams  
 Gregory Adler  
 Jason Airst  
 M. Akash  
 Safie Akbarirad  
 Bader Alhajeri  
 Brian Allan  
 Addison Allen  
 Max Allen  
 Loren Ammerman  
 Leonardo Ancilloto  
 James Anderson  
 Peter Apps  
 Bryan Arnold  
 Derek Arnold  
 Daniel Attuquayefio  
 Jeremy Austin  
 Jim Austin  
 Giorgia Auteri  
 Rafael Avila  
 Cody Aylward  
 Naceur Benamor  
 Heng Bao  
 Mauricio Barbanti  
 Perry Barboza  
 Brian Barnes  
 Savannah Bartel  
 Javan Bauder  
 Carolyn Bauer  
 Beatriz Beisiegel  
 Petr Benda  
 John Benson  
 Brad Bergstrom  
 Riley Bernard  
 Dominique Berteaux  
 Troy Best  
 Adhil Bhagwandin  
 Xiaoxing Bian  
 Peter Billman  
 Christopher Bloch  
 Paulo Bobrowiec  
 Amy Boddy  
 Juliano Bogoni  
 Wes Boone  
 Alex Borisenko  
 Farid Bounaceur  
 Mark Boyce  
 Diane Boyd  
 Caryne Braga  
 Stan Braude  
 Jorge Brito  
 Eric Britzke  
 Maria Buglione  
 Kathrin Burs  
 Andrew Butler  
 John Byers  
 Susana Caballero  
 Miguel Camacho  
 Elissa Cameron  
 Carola Canon  
 Leslie Carraway  
 Michelle Carstensen  
 William Carvalho  
 Jorge Cassinello  
 Paulo Casula  
 Carola Cañón Valenzuela  
 Zhong-Zheng Chen  
 Tina Cheng  
 Edna Chiang  
 Sarah Chinn  
 Rachel Chock  
 Philippe Christe  
 Paolo Ciucci  
 Joseph Clark  
 Jennifer Clarke  
 Marlon E. Cobos  
 Jose Coda  
 Fraser Combe  
 Chris Conroy  
 Siobhan Cooke  
 Rachel Cooper-Bohannon  
 M. Fabiola Corona Figueroa  
 Gabriele Cozzi  
 Evan Craig  
 Michael Cramer  
 Ana Cutrera  
 Nicholas Czaplewski  
 Guillermo D'Elía  
 Joshua Davimes  
 Edward Davis  
 Susan DeVries  
 Randy DeYoung  
 David Delane  
 Terrence Demos  
 Stephan Demarais  
 Christiane Denys  
 Andrew Derocher  
 Pedro Dias  
 Christopher Dickman  
 Shannon Digweed  
 Stephen Ditchkoff  
 Emmanuel Do Linh San  
 F. Stephen Dobson  
 Lacy Dolan  
 Sumit Dookia  
 Anna Doty  
 Jennifer Duggan  
 Miranda Dunbar  
 Trishna Dutta  
 Monica Díaz  
 Luis Ebensperger  
 Susan Elias  
 Cynthia Elizalde-Arellano  
 Kristin Engebretsen  
 Clinton Epps  
 Tania Escalante  
 Jacob Esselstyn  
 Peter Estok  
 Bryn Evans  
 Maria Fanjul  
 Ariel Farias  
 Paul Faure  
 Jose M. Fedriani  
 M. Brock Fenton  
 Adam Ferguson  
 Jesus Fernandez  
 Marco Festa-Bianchet  
 Kyle Finn  
 Jason Fisher  
 Elizabeth Flaherty  
 Mark Ford  
 Barry Fox  
 Gabriel Francescoli  
 Charles Francis  
 Gabriela Franco Dri  
 Danielle Fraser  
 Nathan Fuller  
 Todd Fuller  
 Jean-Michel Gaillard  
 Daniel Gallant  
 Nicolas Galvez  
 Al Gardner  
 Sarah Gaulke  
 William Gearty  
 Hugh Genoways  
 Thomas Giarla  
 Raquel Godinho  
 Jacob Goheen  
 Amanda Goldberg  
 Juan Gomez  
 Susana González  
 Gislene Gonçalves  
 Pablo Gonçalves  
 Jamieson Gorrell  
 Adam Green  
 Dana Green  
 Renato Gregorin  
 Carlos Grelle  
 Lazaro Guevara  
 Pete Guiden  
 Catherine Haase  
 David J. Hafner  
 Kim Hall  
 Kurt Hammerschmidt  
 Maggie Hantak  
 Emilie A. Hardouin  
 James Hare  
 Rich Harris  
 Natalie Haussmann  
 Mark Hayes  
 Gareth Hempson  
 Anuar Hernandez  
 Jacob Hill  
 Arlo Hinckley  
 Anne Honeywell  
 Jinyang Hu  
 Yiming Hu  
 Jenna Hutchen  
 Katherine Ineson

Jake Ivan  
Rhiannon Jakopak  
Fabian Jaksic  
Paul Jensen  
Joseph Johnson  
Landon Jones  
Ferran Jori  
Maya Juman  
Matina Kalcounis-Rueppell  
Tyler Kartzinell  
Matthew Kauffman  
Carson Keller  
Mandy Kellner  
Douglas Kelt  
Sarah Kienle  
Travis King  
Amy Kirkham  
Andrew Kitchener  
Robert Klaver  
Burt Kotler  
Tharaka Kusuminda  
Charlie Kwit  
Maíra Laeta  
Jeffrey Lane  
Hayley Lanier  
Roxanne Larsen  
Angela Larsen-Gray  
Theresa Laverty  
Chad Lehman  
Yuri Leite  
Thomas Lilley  
Burton Lim  
Oliver Lindecke  
Susan Loeb  
Jason Lombardi  
Radek Lucan  
Jeff Lucas  
Daniel Lunney  
Toni Lyn Morelli  
Celia López González  
Jean-Francois Mboumba  
Karen Mabry  
Renan Maestri  
Marcelo Magioli  
Christine Maher  
Sean Maher  
Jason Malaney  
Wlodek Mandecki  
Salvador Mandujano  
Marie Martin  
Lizzi Martinez  
April Robin Martinig  
John Mayer  
Maria Vittoria Mazzamuto  
Andrew McAdam  
Christy McCain  
Bryan McLean  
L. Mech  
Mario Melletti  
Geruza Melo  
Fernando Heberon Menezes  
Ninon Meyer  
Nick Milne  
Alain Missoup  
Ron Moen  
Remington Moll  
Carrie Mongle  
Emily Monk  
Cecilia Montauban  
Leandro Monteiro  
Matias Mora  
Simone Mordue  
Emiliano Mori  
Data Morin  
Shawn Morrison  
Karoliny Nascimento  
Maria Clara do Nascimento  
Jonathan Nations  
Ana Navarro  
Sean Neiswenter  
Daniel Neubaum  
Thomas Newsome  
Peixiao Nie  
Marcelo Nogueira  
Ryan Norris  
Roberto Leonan Novaes  
Rodrigo Nuñez  
Joy O'Keefe  
Teague O'Mara  
Paola Ocampo  
Agustina Ojeda  
Ricardo Ojeda  
Joao Oliveira  
Erik Olson  
Link Olson  
Sandra Ospina-Garcés  
Mayuko Otsuki  
Charity Owings  
Teta Pablo  
Víctor Pacheco  
Geeta Padate  
Ulyses Pardiñas  
Bret Pasch  
Brent Patterson  
Bruce Patterson  
James Patton  
Ana Carolina Pavan  
Alexandre Percequillo  
Paula Perrig  
Roger Perry  
Stephen Petersen  
Willian Peçanha  
Kendra Phelps  
Alexander Piel  
Patricia Pilatti  
Nelish Pradhan  
Silvia Puig  
Jinzhe Qi  
Jiapeng Qu  
Eric Quallen  
Nandini Rajamani  
Daniel Ramalho  
Héctor Ramírez-Chaves  
Catarina Rato  
Deepak Rawal  
Sage Raymond  
Deeann Reeder  
Jonathan Reichard  
O. Reichman  
Scott Reynolds  
Eric Riddell  
Seth Riley  
Rebecca Rimbach  
Chadwick Rittenhouse  
Ricardo Rocha  
Bernal Rodriguez  
Mauriel Rodriguez Curras  
Alejandro Rodríguez  
Meredith Root-Bernstein  
Elias Rosenblatt  
James Roth  
Manuel Ruedi  
Robert Ruggiero  
Amy Russel  
Danilo Russo  
Sara Ryding  
Jorge Salazar-Bravo  
Carmen Salisbury  
R. Sanchez  
Elisa Sandoval  
Margarita Santiago-Alvarado  
Fernanda Santos  
Antonio Santos-Moreno  
Sara Savazza  
Michael Scantlebury  
Cristian Schleich  
David Schmidly  
Niels Martin Schmidt  
Jaclyn Schnurr  
Carolyn Scholz  
Krysten Schuler  
Celia Selem  
Maurício Silveira  
Randeep Singh  
Grant Singleton  
John Skinner  
Andrew Smith  
Lisa Smith  
Matthew Smith  
Winston Smith  
Pipat Soisook  
Sergio Solari  
Michael Somers  
Matthew Sorum  
Adia Sovie  
Anil Soyumert  
Nikica Šprem  
Ryan Sprenger  
Elise Stacy  
Ryan Stephens  
Scott Stepan  
Richard Stevens  
Joseph Stewart  
Kelley Stewart  
Emma Stone  
Jonathan Storm  
Erin Stukenholtz  
Junhu Su  
Pauline Suffice

Julia Sunga  
 Mark T. Swanson  
 Robert Swihart  
 Joseph Szewczak  
 Peter Taylor  
 Jeffrey Thompson  
 Robert Timm  
 Ivanna H. Tomasco  
 Kanji Tomita  
 Anna Treves  
 Jack Tseng  
 Joshua Twining  
 Kenta Uchida  
 Ernest Valdez  
 Ana Valenzuela-Toro  
 Emmi Van Harten  
 Dirk Van Vuren

Bram Vanden Broecke  
 Natasha Vanderhoff  
 Karen Vanderwolf  
 John Vanek  
 Johanna Varner  
 Laura Vázquez  
 Hannah Walker  
 Robert Wallace  
 David Walter  
 Dehua Wang  
 Guiming Wang  
 Vera Warmuth  
 Lucas Wauters  
 Marcelo Weksler  
 Kenneth Welch  
 Theodore Weller  
 Tammy Wilbert

Taylor Wilcox  
 Derek Wildman  
 Jennifer Wilkening  
 Craig Willis  
 Don Wilson  
 Steve Windels  
 Roman Wittig  
 Neal Woodman  
 Megan Wyatt  
 Nan Yagishita-Kyo  
 Chuan Yan  
 Ivy Yen  
 Victor Zhang  
 Xue-Ying Zhang  
 Jiang Zhou  
 Marketa Zimova

### REVIEWERS FOR MAMMALIAN SPECIES IN 2023

Roger Baldwin  
 Jean Philip Boubli  
 Robert Bradley  
 Guy N. Cameron  
 Monica Díaz  
 Guilherme Garbino

Al Gardner  
 Lazaro Guevara  
 John Hanson  
 Eckhard Heymann  
 Vadim Kirilyuk  
 David Mallon

Hugo Mantilla-Meluk  
 Mohamed Khalil Meliane  
 Nelson Novo  
 Steven Ross  
 Dirk Van Vuren

### PROOFERS FOR FOREIGN-LANGUAGE ABSTRACTS IN 2023

Sergio Ticul Alvarez Castanada  
 Heidi Amarilla-Stevens  
 Nuria Bernal  
 Camilo Calderón-Acevedo  
 Juan Pablo Carrera  
 Guillermo D'Elia  
 Silvia E. Pavan  
 Anderson Feijó,

Orlando Gallo  
 Enrique González-Bernardo  
 Adrian Gras-Velazquez  
 Audrey A. Grez Villarroel  
 Negin Mansoori  
 Sofia Marques Silva  
 Alejandro Martinez-Abraín  
 Eduardo Palma

Ana Pavan  
 Anna Penna  
 Héctor E. Ramírez-Chaves  
 Pamela Rivera-Parra  
 Mariana Silva Ferreira  
 Sergio Solari  
 Andrea del Pilar Tarquino-Carbonell  
 Horacio Zaballos Patron
